# Supplementary material for: The fabrication of a self-powered CuInS2/TiO2 heterojunction photodetector and its application in visible light communication with ultraviolet light encryption
Source: Royal Society of Chemistry journal article supplement (doi:10.1039/d1tc03930j), 2021-01-01
Supplement: d1tc03930j1.pdf [file d1tc03930j1.pdf]

## Supporting Information

### **The Fabrication of Self-Powered CuInS<sub>2</sub>/TiO<sub>2</sub> Heterojunction Photodetector and the Application in Visible Light Communication with Ultraviolet Light Encryption**

*Menghan Li, Jianping Xu,\* Kuifeng Zhu,\* Shaobo Shi, Qiuyang Zhang, Yichen Bu,  
Jing Chen, Jianghua Xu, Qin Zheng, Yanjie Su, Xiaosong Zhang, and Lan Li\**

School of Science, Tianjin University of Technology, Tianjin 300384, China.

Tianjin FLY Technology Company Limited, Tianjin 300385, China

School of Science, Key Laboratory of Display Materials and Photoelectric Devices,  
Ministry of Education and Tianjin Key Laboratory for Photoelectric Materials and  
Devices, Tianjin University of Technology, Tianjin 300384, China.

School of Science, Tianjin University of Technology and Education, Tianjin 300222,  
China

\*E-mail: xjp0335@163.com (Jianping Xu)

\*E-mail: 18622029890@126.com (Kuifeng Zhu)

\*E-mail: lilan2000us@126.com (Lan Li)

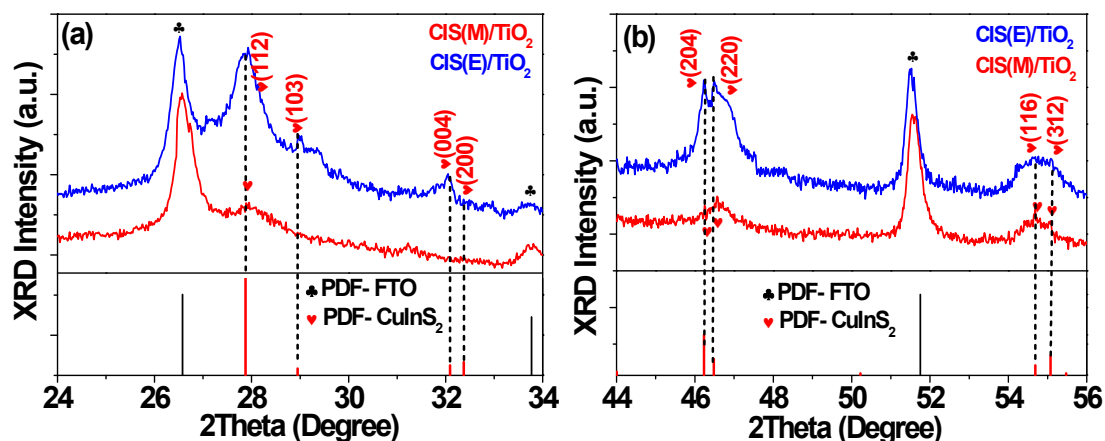

Fig.S1 Enlarged view of CIS XRD patterns for (a) (112), (103), (004) and (200) crystal planes, and (b) (204), (220), (116) and (312) crystal planes

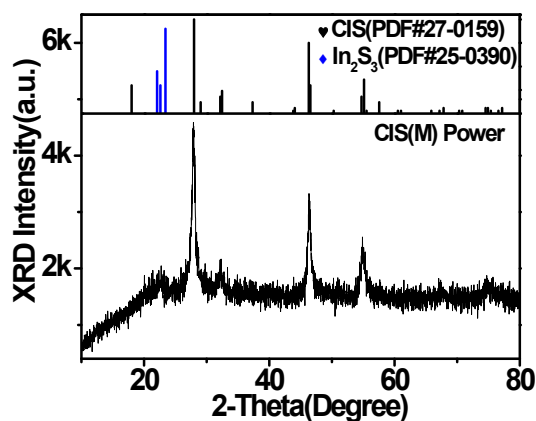

Fig.S2 XRD pattern of CIS powder grown in mixed solvent

Fig.S2 shows the XRD pattern of CIS powder grown in mixed solvent. Except for the weak diffraction peak of  $\text{In}_2\text{S}_3$  at  $2\theta=22.5^\circ$  (PDF#25-0390), all other peaks are single chalcopyrite CIS (PDF#27-0159). The solubility product  $k_{sp}$  of  $\text{In}_2\text{S}_3$  is  $5.7 \times 10^{-74}$  and the solubility product  $k_{sp}$  of  $\text{Cu}_2\text{S}$  is  $3 \times 10^{-48}$ . Because the solubility product of  $\text{In}_2\text{S}_3$  is smaller than  $\text{Cu}_2\text{S}$ , and the  $\text{In}^{3+}$  concentration in the reaction precursor solution

is larger than  $\text{Cu}^+$ , the growth rate of  $\text{In}^{3+}$  in the early stage of reaction is larger than  $\text{Cu}^+$ , which results in the proportion of In being greater than Cu during the growth process, and  $\text{In}_2\text{S}_3$  impurities are more likely to be generated.

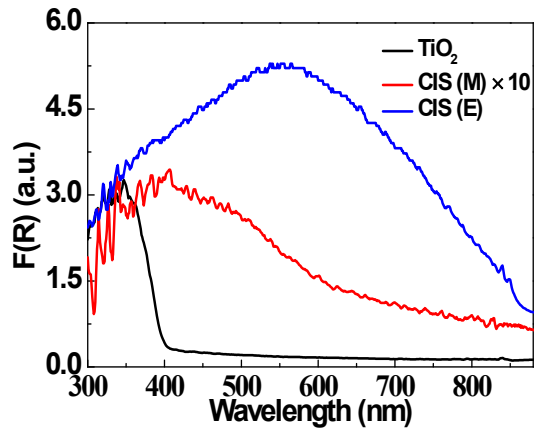

Fig.S3 F(R) spectra in incident light with different wavelengths

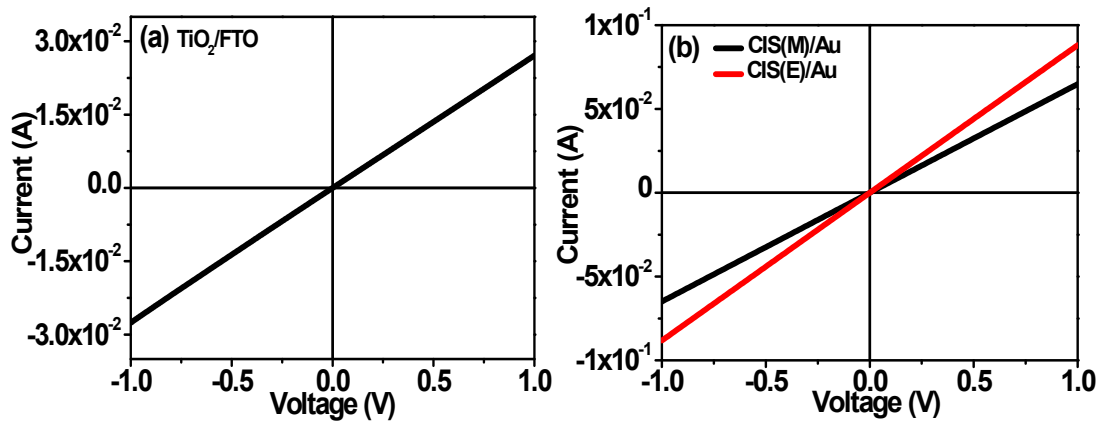

Fig.S4 I-V curves of (a)  $\text{FTO}/\text{TiO}_2$  and (b) CIS/Au

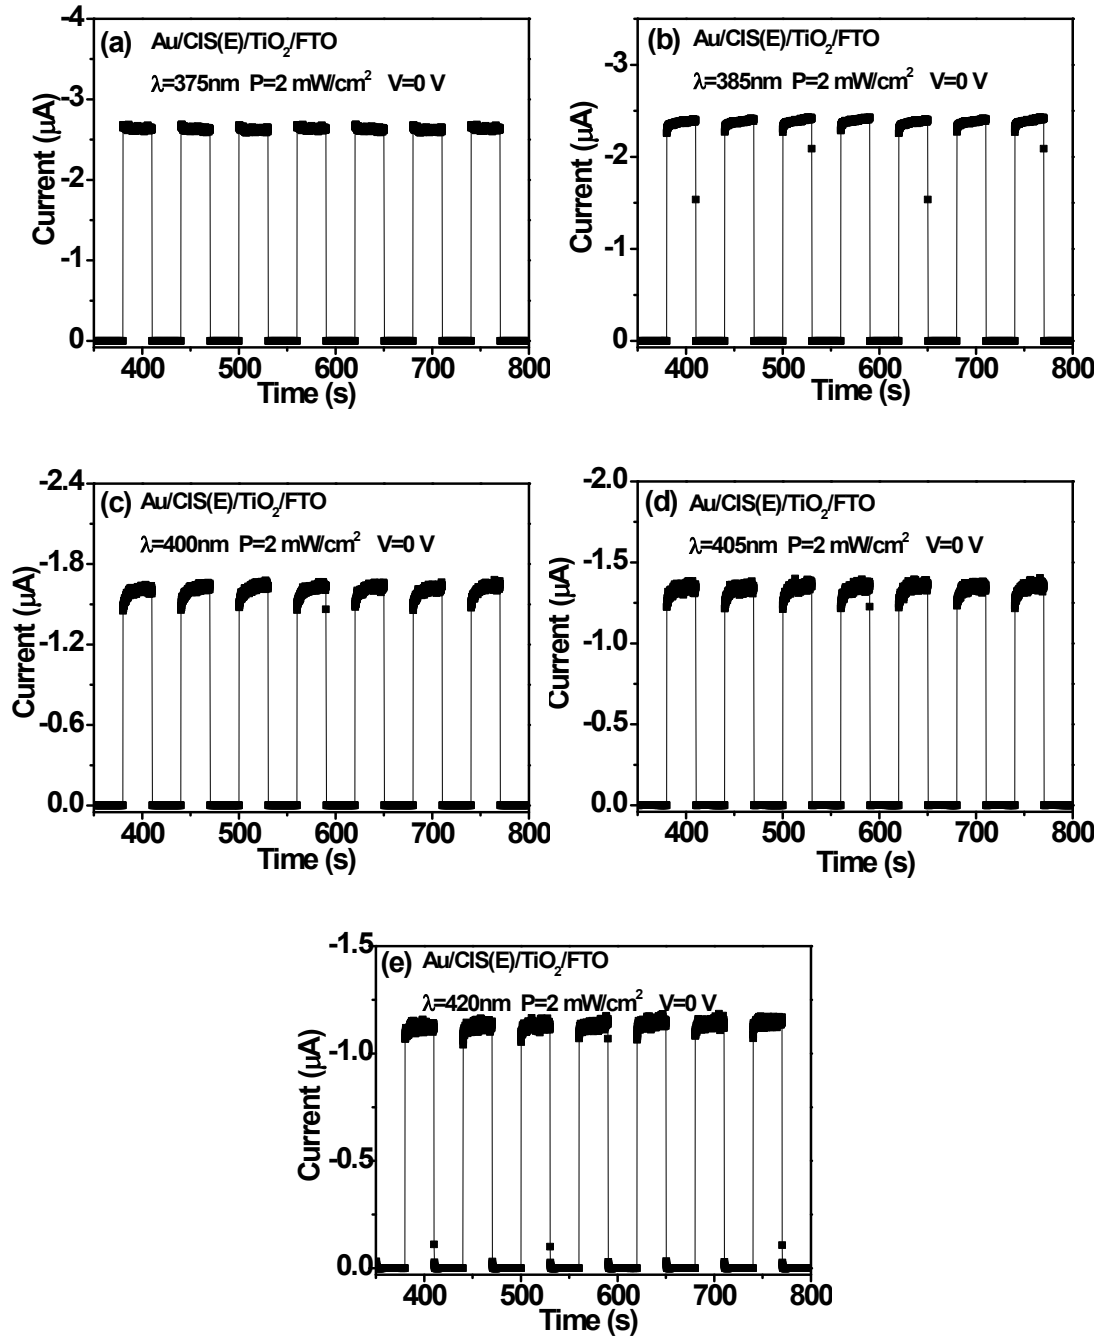

Fig.S5 I-t cycle curves of CIS(E)/TiO<sub>2</sub> heterojunction device under different wavelength illumination



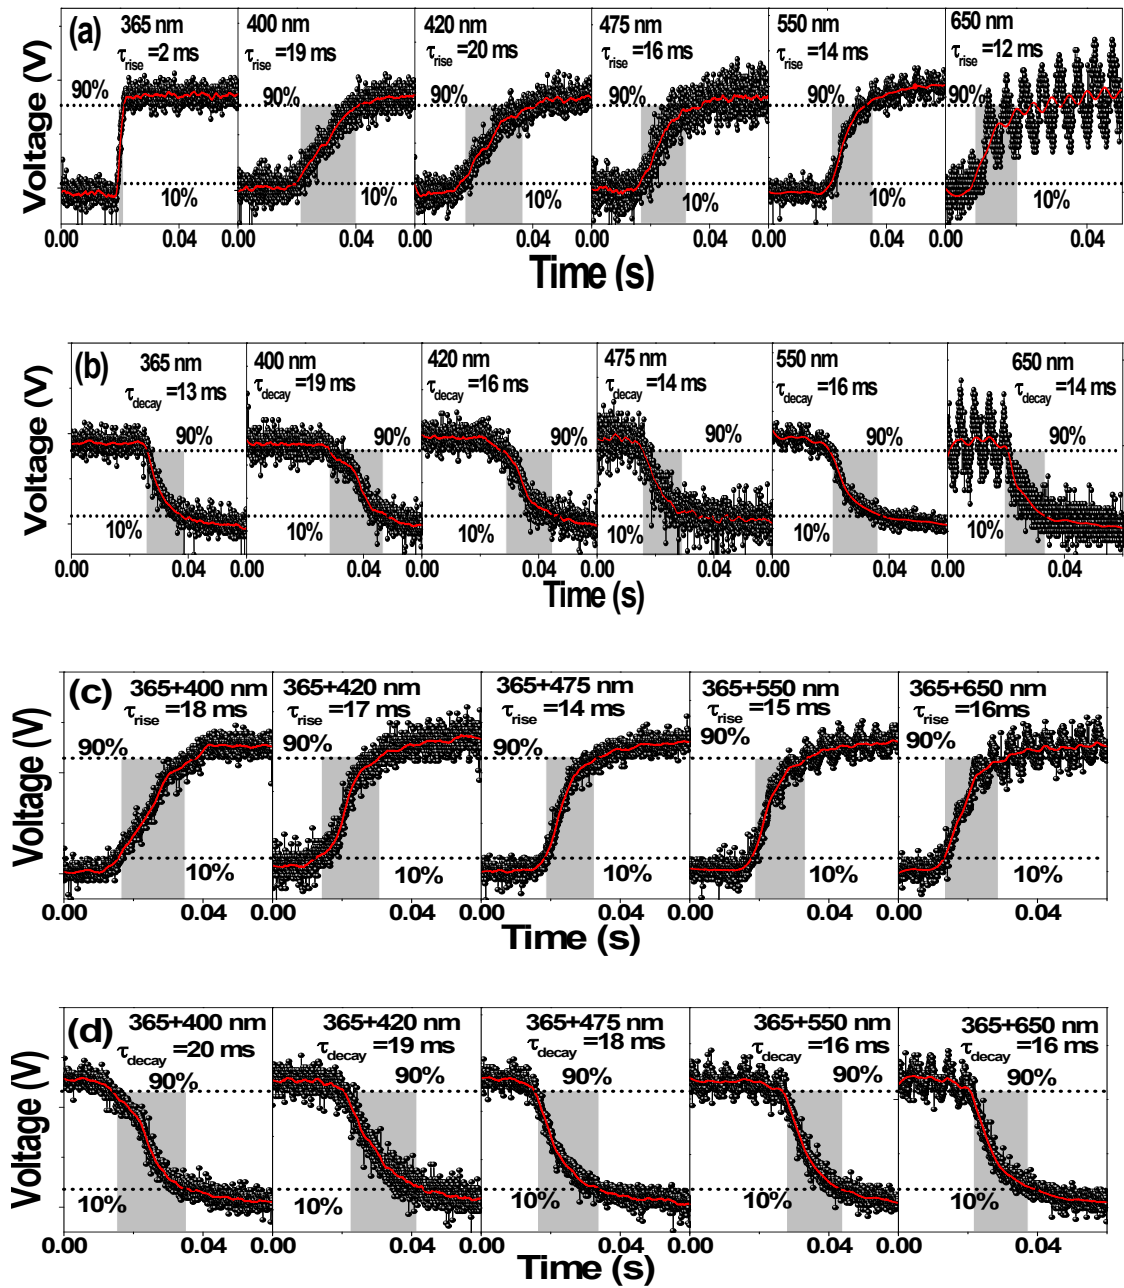

Fig.S6 (a) Response time and (b) Decay time of CIS(E)/TiO<sub>2</sub> heterojunction PD under

monochromatic light irradiation. (c) Response time and (d) Decay time under simultaneous irradiation of UV (365 nm) and visible light with different wavelengths

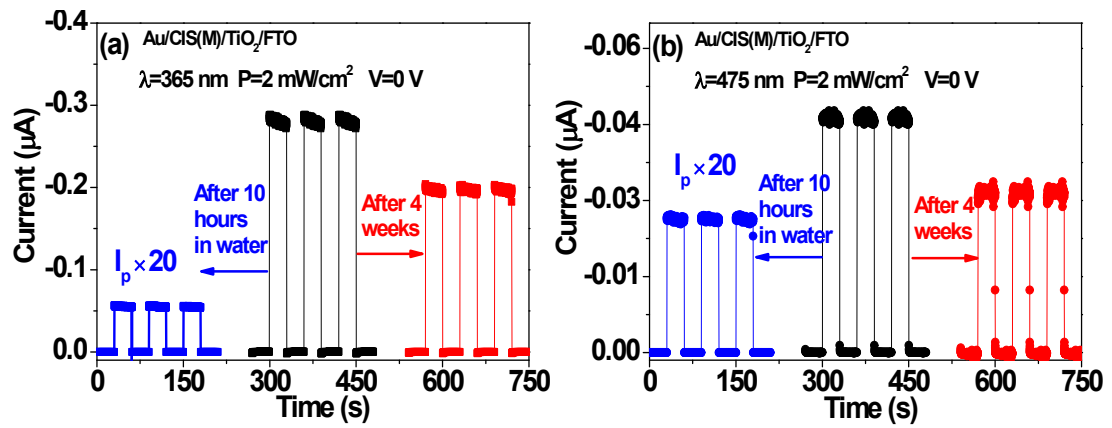

Fig.S7 The poor stability of CIS(M)/TiO<sub>2</sub> heterojunction PD under (a) 365 nm and (b) 475 nm light illumination

Table S1. Cu/In ratio of the CIS films at surface and bulk

| Samples                 | Cu/In Ratio<br>Surface (XPS) | Cu/In Ratio<br>Bulk (EDS) |
|-------------------------|------------------------------|---------------------------|
| CIS(M)/TiO <sub>2</sub> | 0.44                         | 0.72                      |
| CIS(E)/TiO <sub>2</sub> | 0.83                         | 0.98                      |

Table S2. Information about TiO<sub>2</sub> NRs and CIS films obtained from XPS and M-S spectra

| Samples          | N <sub>D</sub> (cm <sup>-3</sup> ) | N <sub>A</sub> (cm <sup>-3</sup> ) | V <sub>FB</sub> (V) | VB (eV) |
|------------------|------------------------------------|------------------------------------|---------------------|---------|
| TiO <sub>2</sub> | 4.67×10 <sup>19</sup>              | --                                 | -0.69               | 2.62    |
| CIS(M)           | --                                 | 8.23×10 <sup>19</sup>              | 0.03                | 0.93    |
| CIS(E)           | --                                 | 6.01×10 <sup>20</sup>              | -0.25               | 0.68    |

| Photodetector                                                                           | Wavelength<br>h<br>(nm)              | Bias<br>(V)               | D*<br>(Jones)         | R<br>(mA/W)           | I <sub>ph</sub> /I <sub>d</sub> | T <sub>r</sub><br>(ms) | Ref. |
|-----------------------------------------------------------------------------------------|--------------------------------------|---------------------------|-----------------------|-----------------------|---------------------------------|------------------------|------|
| Organics/CIS-<br>ZnS Core-<br>Shell                                                     | 450                                  | -40<br>(V <sub>GS</sub> ) | 3.76×10 <sup>11</sup> | 860                   | 120                             | < 5                    | 16   |
| QDs/Organics<br>SiO <sub>2</sub> /CIS-ZnS<br>Core-Shell<br>QDs -<br>graphene/Au         | 660<br>(5 mW)                        | V <sub>DS</sub>           | --                    | 35×10 <sup>3</sup>    | --                              | --                     | 19   |
| ITO/ZnO-CIS<br>QDs/TFB/PED<br>OT:PSS/Al                                                 | 620<br>(14.2<br>mW/cm <sup>2</sup> ) | 0                         | 2.5×10 <sup>10</sup>  | 0.53                  | --                              | --                     | 20   |
| Si/SiO <sub>2</sub> /MoS <sub>2</sub> /<br>CIS<br>QDs/AuNPs<br>ITO/TiO <sub>2</sub> /PV | 635                                  | 4.5<br>(V <sub>DS</sub> ) | 2.27×10 <sup>12</sup> | 16.65×10 <sup>3</sup> | 24.1                            | 5×10 <sup>2</sup>      | 21   |

|                                                                                       |                                   |    |                      |      |                     |    |              |
|---------------------------------------------------------------------------------------|-----------------------------------|----|----------------------|------|---------------------|----|--------------|
| K:CIS-ZnS<br>QDs/MoO <sub>3</sub> /Ag<br>Si/SiO <sub>2</sub> /CIS-<br>ZnS<br>QDs/UCNP | 980                               | 25 | --                   | --   | --                  | -- | 23           |
| FTO/TiO <sub>2</sub> /CIS<br>/Au                                                      | 365<br>(2<br>mW/cm <sup>2</sup> ) | 0  | 1.3×10 <sup>12</sup> | 44.8 | 2.7×10 <sup>4</sup> | 2  | This<br>work |
| FTO/TiO <sub>2</sub> /CIS<br>/Au                                                      | 650<br>(2<br>mW/cm <sup>2</sup> ) | 0  | 4.7×10 <sup>11</sup> | 15.6 | 9.2×10 <sup>3</sup> | 12 | This<br>work |

Table S3. Performance parameters based on CIS PDs
